# Supplementary material for: PRISM II: an open-label study to assess effectiveness of dextromethorphan/quinidine for pseudobulbar affect in patients with dementia, stroke or traumatic brain injury
Source: Springer Nature journal article supplement (doi:10.1186/s12883-016-0609-0), 2016-06-04
Supplement: MOESM1 [file 10243780]

**16.1.3 List of IECs or IRBs and Sample Consent Form(s)**

| <b>IEC/IRB</b>                                                                   | <b>Investigator (Number)</b>                                                                                                                                                                                                                                                                                                                                                                                                                                                                                                                                                                                                                                                                                                                                                                                                                                                                                                                                                                                                                                                                                                                                                                                                                                                |
|----------------------------------------------------------------------------------|-----------------------------------------------------------------------------------------------------------------------------------------------------------------------------------------------------------------------------------------------------------------------------------------------------------------------------------------------------------------------------------------------------------------------------------------------------------------------------------------------------------------------------------------------------------------------------------------------------------------------------------------------------------------------------------------------------------------------------------------------------------------------------------------------------------------------------------------------------------------------------------------------------------------------------------------------------------------------------------------------------------------------------------------------------------------------------------------------------------------------------------------------------------------------------------------------------------------------------------------------------------------------------|
| Copernicus Group IRB<br>P.O. Box 110605<br>Research Triangle Park, NC 27709, USA | Acevedo, Paul A (257)<br>Ahmed, Syed Shoaib (101)<br>Ajtai, Bela (167)<br>Akhtar, Nadeem (199)<br>Akmal Shamsi, Mohammad Ali (235)<br>Allison, Dale Crawford (520)<br>Alva, Gustavo (106)<br>Alvarez, Maria Victoria (156)<br>Anderson, Allan A. (258)<br>Antin, Todd M (107)<br>Arends, Douglas (168)<br>Arnold, Thomas W (157)<br>Arocha, Emelina A (216)<br>Axley, John H (108)<br>Baber, Riaz Ahmad (238)<br>Balter, Jordan M (190)<br>Barker, James T (538)<br>Bayrakdarian, Carlo (102)<br>Benjamin, Sabrina Ann (225)<br>Berger, Malcolm (229)<br>Blake, David M (256)<br>Blanco, Guillermo (542)<br>Booker, J Gary (217)<br>Bowers, David N (263)<br>Brar, Saroj (110)<br>Brenes, Joseph A (111)<br>Bull, Janet (206)<br>Capps, Raymond L (237)<br>Carey, John Timothy (218)<br>Chappel, Christopher M (115)<br>Chepuru, Yadagiri (173)<br>Choi, John Y (118)<br>Collins, John O (103)<br>Crane, Monica (120)<br>Crumpacker, David W (121)<br>Cusi, Antonio (201)<br>D'Amico, Stephen J (202)<br>De Bien, Laura (540)<br>De Llanos, Ariel (264)<br>Desai, Urvi (191)<br>Dreize, Richard M (519)<br>Fellus, Jonathan (122)<br>Ferencz, Gerald J (219)<br>Fruchter, Gerald (558)<br>Fullerton, John H (126)<br>Genovese, Michael V (251)<br>Gheorghiu, Bogdan P (174) |

| IEC/IRB | Investigator (Number)              |
|---------|------------------------------------|
|         | Goldberg, Sheldon (128)            |
|         | Goldstein, Susanna (129)           |
|         | Gonzalez, Blanca (211)             |
|         | Goodwin, John Joseph (196)         |
|         | Green, Benny (545)                 |
|         | Gudesblatt, Mark (537)             |
|         | Harding, Herndon Price (261)       |
|         | Horst, James (207)                 |
|         | Iqbal, Naveed (180)                |
|         | Isaacson, Stuart H (503)           |
|         | Kanneganti, Prasad (200)           |
|         | Kellogg, Jason (132)               |
|         | Kellogg, Kevin (228)               |
|         | Kim, Lance (133)                   |
|         | Knubley, William Arthur (134)      |
|         | Kohlenberg, Cary J (135)           |
|         | Li, George (534)                   |
|         | Linden, David E (136)              |
|         | Lopez, Jose C (249)                |
|         | Mankowski, Kenneth A (234)         |
|         | Martinez, Kenneth Patrick (224)    |
|         | McLaughlin, Paul E (527)           |
|         | Michel, Elliot M (248)             |
|         | Moore, Norman (141)                |
|         | Moya, Jaynier (536)                |
|         | Pardo, Ricardo R (146)             |
|         | Pass, Mark D (241)                 |
|         | Patel, Meenakshi (147)             |
|         | Pfeffer, Michael M (528, 546)      |
|         | Pretorius, Harold T (255)          |
|         | Pulver, David C (539)              |
|         | Quinn, Pamela Michele Galvin (250) |
|         | Raikhel, Marina (528)              |
|         | Ranjan, Rakesh (259)               |
|         | Richard, John W (246)              |
|         | Rios, Jose A (253)                 |
|         | Riser, John Byron (149)            |
|         | Rodriguez, Ivan D (253)            |
|         | Ross, Daniel (104)                 |
|         | Roudachevski, Evgueni (240)        |
|         | Rubin, Bruce (165, 267)            |
|         | Sanchez, Sigrid A (528)            |
|         | Schechter, Steven H (533)          |
|         | Serentill, Luis (506)              |
|         | Shafer, Stuart James (510)         |
|         | Shua-Haim, Joshua R (150)          |
|         | Singh, Upinder (166)               |
|         | Sky, Adam (151)                    |
|         | Smirnoff, Alexander John (188)     |

| <b>IEC/IRB</b>                                                                                                                                                                                  | <b>Investigator (Number)</b>                                                                                                                                                                                                                                                                                                           |
|-------------------------------------------------------------------------------------------------------------------------------------------------------------------------------------------------|----------------------------------------------------------------------------------------------------------------------------------------------------------------------------------------------------------------------------------------------------------------------------------------------------------------------------------------|
|                                                                                                                                                                                                 | Stalker, Andrew P (232)<br>Stoltz, Steven M (513)<br>Tobias, Hal M (153)<br>Vaishnavi, Sandeep (209)<br>Valdes, Martin (221)<br>Vasquez, Alberto B (509)<br>Vidic, Thomas R (154)<br>Walton, Marie L (529)<br>Weinstein, Bryan Sidney (195)<br>Wellman, Charles V (222)<br>Yapundich, Robert A (505)<br>Zarate-Rowell, Elizabeth (544) |
| Wayne State University Institutional Review Board<br>IRB Administration Office<br>87 East Canfield, Second Floor<br>Detroit, MI 48201, USA                                                      | Meythaler, Jay (223)                                                                                                                                                                                                                                                                                                                   |
| Wake Forest University Health Sciences<br>Office of Research<br>Institutional Review Board<br>Medical Center Boulevard<br>Winston-Salem, NC 27157-1023, USA                                     | Siddiqui, Mustafa (198)                                                                                                                                                                                                                                                                                                                |
| The State University of New York at Buffalo Health<br>Sciences Institutional Review Board<br>Clinical Translational Research Center<br>875 Ellicott Street, Room 5018<br>Buffalo, NY 14203, USA | Ching, Marilou (117)                                                                                                                                                                                                                                                                                                                   |
| Atlantic Health System Institutional Review Board<br>475 South Street<br>Morristown, NJ 07960, USA                                                                                              | Felberg, Robert A (210)                                                                                                                                                                                                                                                                                                                |
| Burke Rehabilitation Hospital Committee for Human<br>Rights in Research<br>785 Mamaroneck Avenue<br>White Plains, NY 10605, USA                                                                 | Fonzetti, Pasquale (124)                                                                                                                                                                                                                                                                                                               |
| University of Louisville Institutional Review Board<br>MedCenter One, Suite 200<br>501 E. Broadway<br>Louisville, KY 40202-1798, USA                                                            | Kaelin, Darryl (193)                                                                                                                                                                                                                                                                                                                   |
| Baylor Research Institute IRB<br>3310 Live Oak, Suite 501<br>Dallas, TX 75204                                                                                                                   | Khoury, Chaouki (215)                                                                                                                                                                                                                                                                                                                  |

| <b>IEC/IRB</b>                                                                                                                                                         | <b>Investigator (Number)</b>                |
|------------------------------------------------------------------------------------------------------------------------------------------------------------------------|---------------------------------------------|
| Vanderbilt University Institutional Review Board<br>504 Oxford House<br>Nashville, TN 37232-4315, USA                                                                  | Kirshner, Howard S. (245)                   |
| Western Institutional Review Board<br>1019 39 <sup>th</sup> Avenue, SE, Suite 120<br>Puyallup, WA 98374-2115, USA                                                      | Lippa, Carol (137)<br>Jacome, Tomas H (197) |
| Poudre Valley Health System Institutional Review Board<br>2002 Caribou, Suite 100<br>Fort Collins, CO 80525, USA                                                       | McIntosh, Gerald C. (254)                   |
| East Texas Medical Center Regional Healthcare System Institutional Review Board<br>721 Clinic Drive<br>Tyler, TX 75701, USA                                            | Plotkin, George (247)                       |
| Institutional Review Board for Human Research at St. Joseph's Hospital and Medical Center<br>Research Administration<br>350 West Thomas Road<br>Phoenix, AZ 85013, USA | Shi, Jiong (220)                            |
| The Methodist Hospital Research Institute<br>6670 Bertner Street<br>Houston, TX 77030, USA                                                                             | Spann, Bryan (152)                          |
